# Supplementary material
Source: PubMed Central journal article supplement (PMC7226850)
Supplement: ao9b03678_si_001.pdf [file ao9b03678_si_001.pdf]

## Supporting Information

### **Fabrication of Silver Nanowire/Polydimethylsiloxane Dry Electrodes by a Vacuum Filtration Method for Electrophysiological Signal Monitoring**

*Ravinder Reddy Kisannagar<sup>1#</sup>, Pallavi Jha<sup>1#</sup>, Ambuja Navalkar<sup>2</sup>, Samir K maji<sup>2</sup>, Dipti Gupta<sup>1\*</sup>*

<sup>1</sup>Plastic Electronics and Energy Laboratory (PEEL), Department of Metallurgical Engineering and Materials Science, Indian Institute of Technology Bombay, Mumbai, India-400076.

<sup>2</sup>Department of Bioscience and Engineering, Indian Institute of Technology Bombay, Mumbai, India-400076.

<sup>#</sup>Ravinder Reddy Kisannagar and Pallavi Jha contributed equally to this work

<sup>\*</sup> Author to whom correspondence should be addressed. Email: [diptig@iitb.ac.in](mailto:diptig@iitb.ac.in)

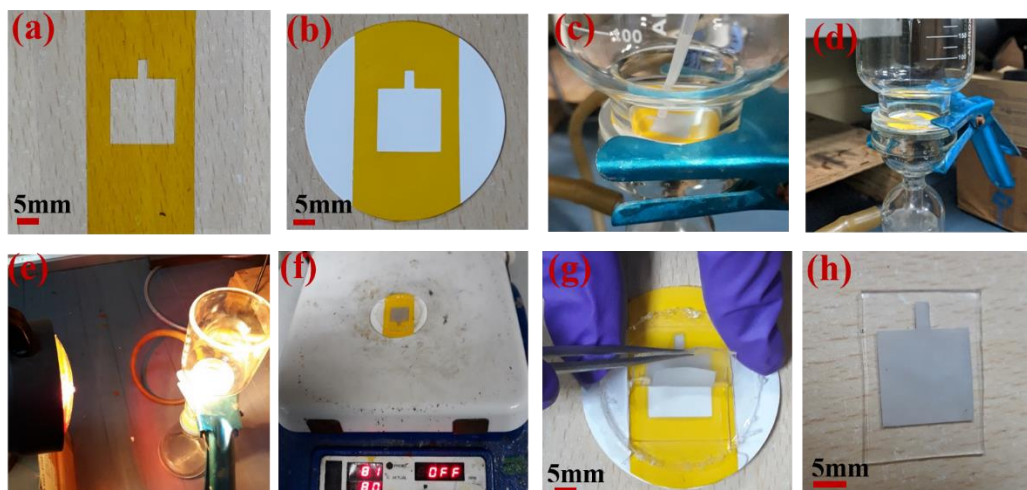

Figure S1 (a) Patterned polyimide tape on PET using a programmable mechanical cutter, (b) Pattern transfer to filter paper, (c) vacuum filtering of AgNW solution for 10 min, (d)-(e) pouring PDMS and curing under IR lamp, (f) partially cured PDMS on AgNWs filtrate transferred on to hot plate and cured at 80°C for 1 hr, (g) transferring of AgNW network from the filter paper to PDMS and (h) AgNW/PDMS electrode.

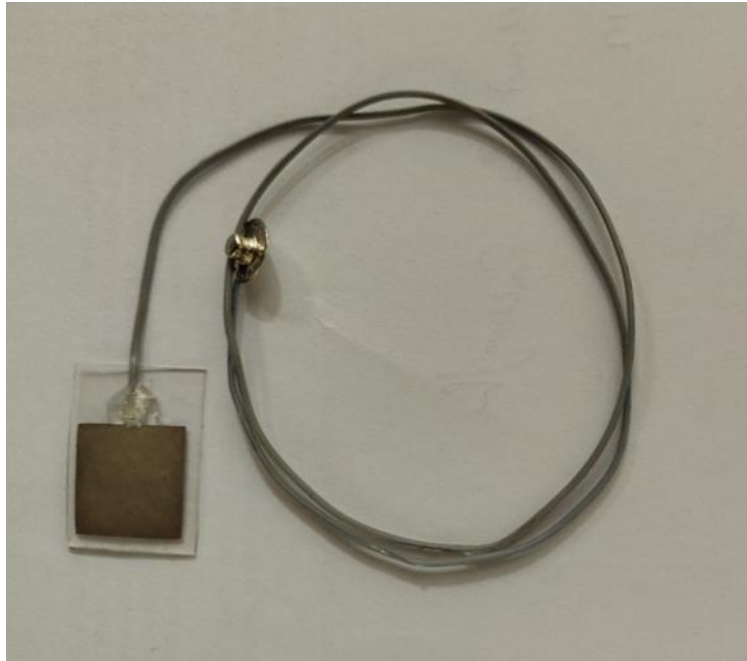

Figure S2 Shows the AgNW/PDMS dry electrode with wire and metal snap.

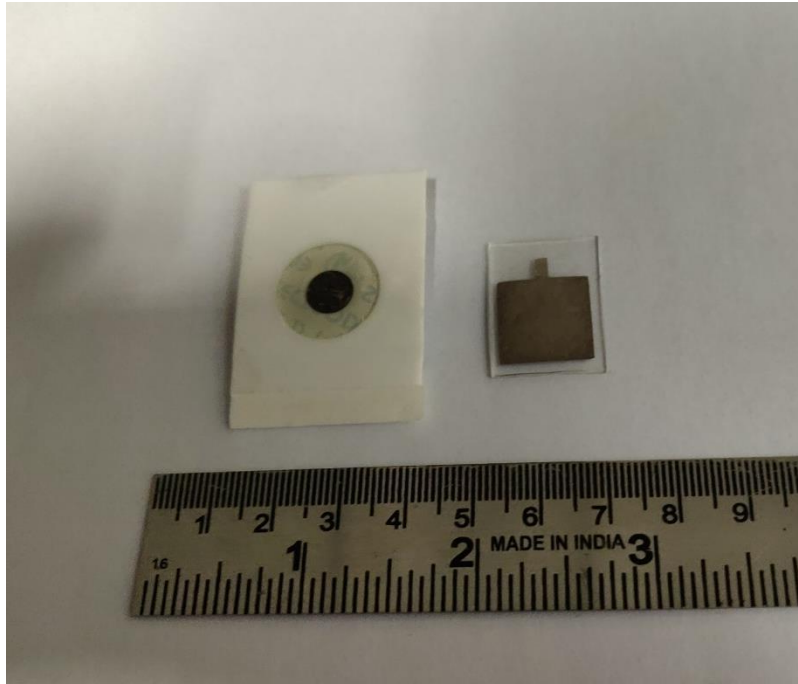

Figure S3 Shows the optical image of the conventional Ag/AgCl and AgNW/PDMS dry electrode.

**The active area of the electrodes**

For AgNW/PDMS dry electrodes: 1.5cm x 1.5cm

$$= 2.25\text{cm}^2$$

For Ag/AgCl wet electrodes: 1.7 cm diameter

$$= 2.27\text{cm}^2$$

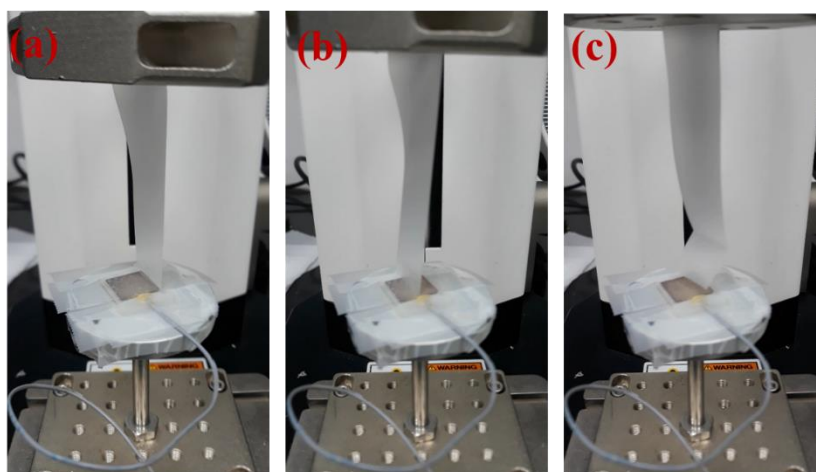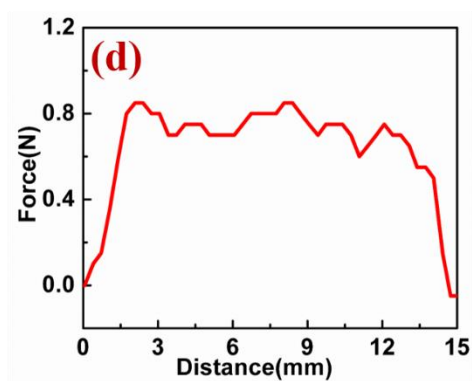

Figure S4 (a)-(c) set up for measuring adhesion strength of patterned AgNWs on PDMS and (d) adhesion strength vs distance curve.

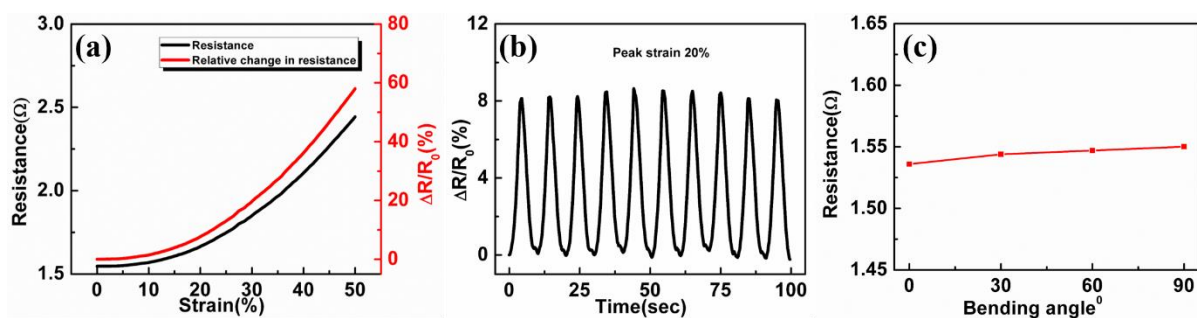

Figure S5 (a) Resistance and the relative change in resistance of the AgNW/PDMS electrode as function of applied strain, (b) The relative change in resistance of AgNW/PDMS electrode vs. time under cyclic loading and unloading and (c) resistance of the AgNW/PDMS electrode vs. bending angle.

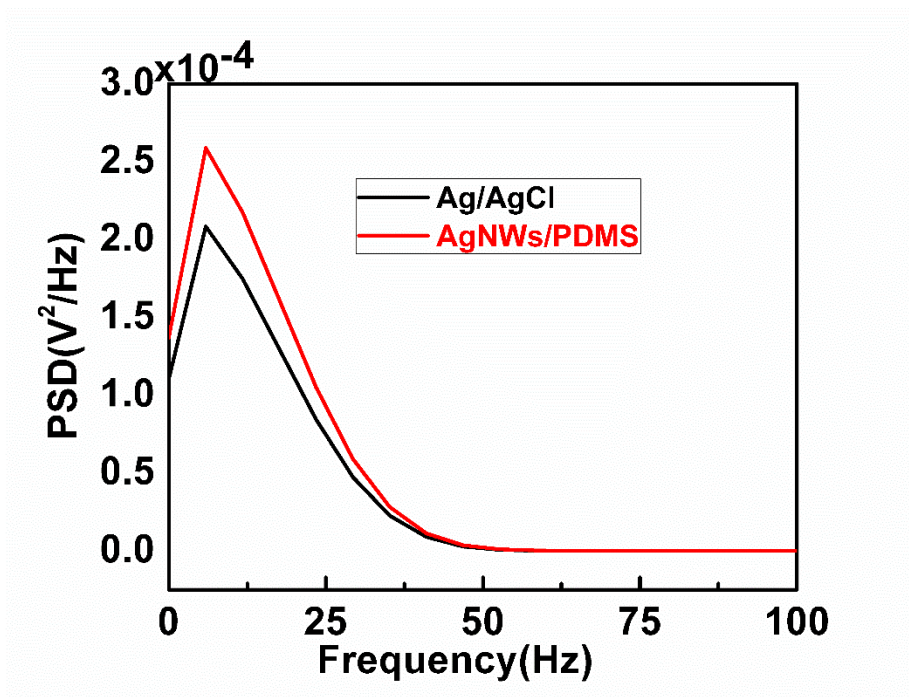

Figure S6 Shows the power spectral density (PSD) of the Ag/AgCl (black) and AgNW/PDMS dry (red) electrode.

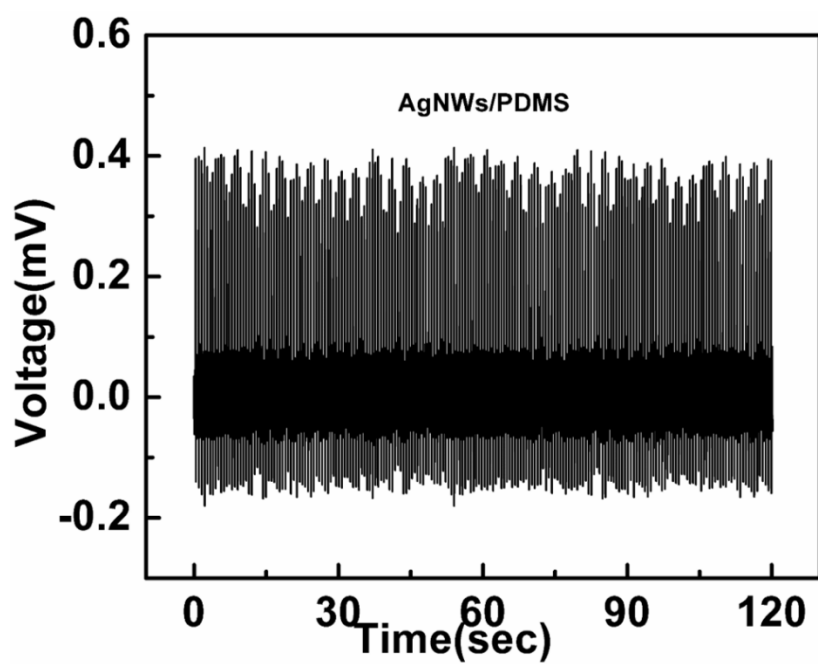

Figure S7 Shows continuous ECG signal from AgNW/PDMS dry electrodes for 120sec



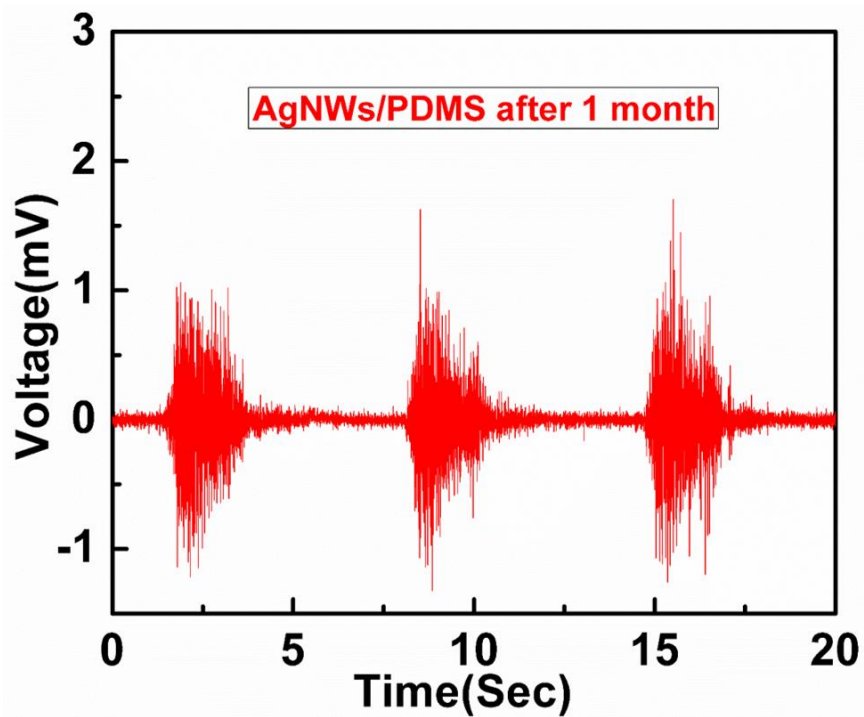

Figure S8 shows the obtained EMG signal from AgNW/PDMS dry electrodes after one month.
